# Supplementary material
Source: HighWire-hosted journal article supplement (https://jmg.bmj.com/content/jmedgenet-2019-106411)
Supplement: inline-supplementary-material-1 [file inline-supplementary-material-1.pdf]

Supplementary Table 1. Demographics and clinical characteristics of AIS patients

|                                                  | AIS trios (n=40) | Sporadic AIS (n=183) | In-house controls (n=153) |
|--------------------------------------------------|------------------|----------------------|---------------------------|
| Sex, n (%)                                       |                  |                      |                           |
| Male                                             | 3 (7.5%)         | 21 (11.48%)          | 14 (9.15%)                |
| Female                                           | 37 (92.5%)       | 162 (88.52%)         | 139 (90.85%)              |
| Age of curve onset <sup>a</sup> , yrs, mean ± SD | 12.48 ± 1.77     | 12.50 ± 1.74         | 12.76 ± 1.86              |
| Age at menarche, yrs, mean ± SD                  | 13.60 ± 0.50     | 13.18 ± 1.34         | 13.46 ± 1.52              |
| Lenke classification, n (%)                      |                  |                      |                           |
| 1                                                | 2 (5%)           | 21 (11.48%)          |                           |
| 2                                                | 20 (50%)         | 90 (49.18%)          |                           |
| 3                                                | 5 (12.5%)        | 23 (12.57%)          |                           |
| 4                                                | 5 (12.5%)        | 22 (12.02%)          |                           |
| 5                                                | 5 (12.5%)        | 24 (13.11%)          |                           |
| 6                                                | 3 (7.5%)         | 3 (1.64%)            |                           |
| Spinal curve at first presentation, °, mean ± SD | 18.18 ± 4.07     | 18.14 ± 4.06         |                           |
| Body mass index, Kg/m <sup>2</sup> , mean ± SD   | 21.88 ± 2.62     | 21.97 ± 2.52         | 22.53 ± 3.70              |

<sup>a</sup>In case of In-house controls, it means the age of individuals when enrolled.

Supplementary Table 2. Summary data and technical characters of exome sequencing data

| Average Raw<br>bases (Mb) | Average<br>QC rates (%) | Average<br>Target average<br>read length | Average Total<br>reads mapping<br>rate (%) | Average Total<br>bases mapping<br>rate (%) | Average Target<br>bases capture rate<br>(%) | Average Target<br>mean depth | Average Target<br>covered mean<br>depth | Average TC<br>10%X<br>coverage<br>rate (%) | Average<br>Ti/Tv |
|---------------------------|-------------------------|------------------------------------------|--------------------------------------------|--------------------------------------------|---------------------------------------------|------------------------------|-----------------------------------------|--------------------------------------------|------------------|
| 11729.02                  | 96.03                   | 147                                      | 99.58                                      | 98.84                                      | 76.78                                       | 130.28                       | 130.54                                  | 99.47                                      | 2.30             |

Supplementary Table 3. AIS-Associated genes

| Gene Name                                             | References                       | Animal model studies             |
|-------------------------------------------------------|----------------------------------|----------------------------------|
| <b>Genes implicated in human idiopathic scoliosis</b> |                                  |                                  |
| <i>ABO</i>                                            | PMID:30395268                    | NA                               |
| <i>AKAP2</i>                                          | PMCID: PMC4941158                | NA                               |
| <i>CALM1</i>                                          | PMID:3914287                     | NA                               |
| <i>CDH13</i>                                          | PMID:30395268                    | NA                               |
| <i>CHL1</i>                                           | PMID:21216876                    | NA                               |
| <i>CNTNAP2</i>                                        | PMID:21216876                    | NA                               |
| <i>COL11A2</i>                                        | PMCID: PMC4690498                | NA                               |
| <i>DSCAM</i>                                          | PMID:21216876                    | NA                               |
| <i>ESR1</i>                                           | PMIDs:12438984,16648749          | NA                               |
| <i>ESR2</i>                                           | PMID:19337134                    | NA                               |
| <i>FBN1</i>                                           | PMID:24833718                    | NA                               |
| <i>FBN2</i>                                           | PMID:24833718                    | NA                               |
| <i>GPER</i>                                           | PMID:22002330                    | NA                               |
| <i>GPR126</i>                                         | PMIDs:23666238 , 28198779        | Spinal curvature in KO mouse     |
| <i>IGF1</i>                                           | PMID:23364988                    | NA                               |
| <i>IL6</i>                                            | PMIDs:18007247,20675750          | NA                               |
| <i>LBX1</i>                                           | PMIDs:28334814 ,22019779         | NA                               |
| <i>LBX1AS1</i>                                        | PMCID: PMC4595747                | NA                               |
| <i>MAPK7</i>                                          | PMID:28714182                    | Curved body axis in MO zebrafish |
| <i>MATN1</i>                                          | PMIDs:22193623,2986210, 24469715 | NA                               |
| <i>PAX1</i>                                           | PMID:25784220                    | NA                               |
| <i>POC5</i>                                           | PMID:25642776                    | Curved body axis in MO zebrafish |
| <i>SLC39A8</i>                                        | PMID:30301978                    | Curved body axis in MO zebrafish |
| <i>SOX6</i>                                           | PMID:30395268                    | NA                               |

|                                                                                          |                                               |                                                 |
|------------------------------------------------------------------------------------------|-----------------------------------------------|-------------------------------------------------|
| <i>TIMP2</i>                                                                             | PMID:21228746                                 | NA                                              |
| <i>TNFRSF11B(OPG)</i>                                                                    | PMID:19705167                                 | NA                                              |
| <i>TPH1</i>                                                                              | PMID:18794762                                 | NA                                              |
| <i>VDR</i>                                                                               | PMID:2989276                                  | NA                                              |
| <b>genes whose inactivation or mutation results in IS phenotype in mice or zebrafish</b> |                                               |                                                 |
| <i>CCDC103</i>                                                                           | PMIDs:22581229, 23796196                      | Curved body axis in MO zebrafish larvae         |
| <i>CCDC151</i>                                                                           | PMIDs: 27284198, 25192045                     | Curved body axis in MO zebrafish                |
| <i>CCDC28B</i>                                                                           | PMIDs: 23015189, 14676542                     | Curved and shortened body axis in MO zebrafish  |
| <i>CCDC40</i>                                                                            | PMIDs: 27284198, 21131974                     | Curved body axis in MO zebrafish                |
| <i>C21ORF59</i>                                                                          | PMID:27284198                                 | Curved body axis in MO zebrafish                |
| <i>CLUAP1</i>                                                                            | PMID: 25348401                                | Kyphosis phenotype in KO mouse model            |
| <i>DCDC2</i>                                                                             | PMIDs: 25557784, 19066617                     | Curved body axis and kinky tail in MO zebrafish |
| <i>DNAAF3</i>                                                                            | PMIDs:22387996, 23796196, 17449765, 8414746   | Curved body axis in MO zebrafish                |
| <br>                                                                                     |                                               |                                                 |
| <i>DYX1C1</i>                                                                            | PMIDs: 23650548, 23796196, 17449765, 8414746  | Curved body axis in MO zebrafish larvae         |
| <br>                                                                                     |                                               |                                                 |
| <i>FLNB</i>                                                                              | PMIDs:17360453,17635842,23979929, 24760772    | Spinal curvature in KO mouse                    |
| <i>HSPB11</i>                                                                            | PMID: 22205996                                | Curved body axis in MO zebrafish larvae         |
| <i>IFT122</i>                                                                            | PMID:20493458                                 | Curved body axis in MO zebrafish larvae         |
| <i>IFT172</i>                                                                            | PMIDs: 19517571, 12637423, 23456818, 19361615 | Curved body axis in MO zebrafish larvae         |
| <i>IFT27</i>                                                                             | PMID: 25446516                                | Spinal curvature in KO mouse                    |
| <i>IFT57</i>                                                                             | PMID: 19517571                                | Curved body axis in MO zebrafish larvae         |
| <i>IFT80</i>                                                                             | PMID: 17468754                                | Curved body axis in MO zebrafish larvae         |
| <i>IFT88</i>                                                                             | PMID: 19517571                                | Curved body axis in MO zebrafish larvae         |
| <i>KIF3B</i>                                                                             | PMIDs: 22308397, 19384852                     | Curved body axis in MO zebrafish larvae         |
| <i>KIF6</i>                                                                              | PMID:25283277                                 | Curved body axis in MO zebrafish                |

---

|                 |                                               |                                                       |
|-----------------|-----------------------------------------------|-------------------------------------------------------|
| <i>OFD1</i>     | PMID:18971206                                 | Curved body axis in MO zebrafish larvae               |
| <i>PCMI</i>     | PMID: 22767577                                | urved body axis in MO zebrafish larvae                |
| <i>PTK7</i>     | PMIDs: 27284198, 25182715                     | Curved body axis in MO zebrafish                      |
| <i>RP2</i>      | PMIDs: 16770799, 21282572                     | Slight to sever curved tail in MO zebrafish larvae    |
| <i>RPGR</i>     | PMIDs: 16770799, 22927466                     | Curved body axis in MO zebrafish larvae               |
| <i>RPGRIP1L</i> | PMIDs: 20301500, 15473174, 22927466, 19955120 | Curved tail in MO zebrafish larvae                    |
| <i>SDCCAG8</i>  | PMIDs: 20835237, 14676542                     | Curved and shortened body axis in MO zebrafish larvae |
| <i>TTC26</i>    | PMID: 22718903                                | Curved body axis in MO zebrafish larvae               |
| <i>TLL3</i>     | PMID: 21262966                                | Curved body axis in MO zebrafish larvae               |
| <i>TLL6</i>     | PMID: 25446516                                | Curved body axis in MO zebrafish larvae               |
| <i>ZMYND10</i>  | PMID:30420648                                 | Curved body axis in MO zebrafish larvae               |

---

Supplementary Table 4. Rare-damaging variants identified in AIS trios

| Gene            | Chr: position<br>(hg 19) | Variant  | Consequence | Max freq <sup>a</sup> | Case    |
|-----------------|--------------------------|----------|-------------|-----------------------|---------|
| <i>FLNB</i>     | 3:58090892               | c.C1696T | p.R566W     | N                     | Trio 25 |
|                 | 3:58090893               | c.G1697T | p.R566L     | N                     | Trio 22 |
|                 | 3:58090941               | c.T1745C | p.L582P     | N                     | Trio 31 |
|                 | 3:58109123               | c.G3430C | p.E1144Q    | 7.21E-03              | Trio 32 |
|                 | 3:58141758               | c.G6844A | p.A2282T    | N                     | Trio 27 |
| <i>CNTNAP2</i>  | 7:146536932              | c.A338G  | p.Y113C     | 7.42E-04              | Trio 3  |
|                 | 7:146829467              | c.A1214G | p.N405S     | N                     | Trio 5  |
|                 | 7:147092836              | c.C1634T | p.A545V     | 3.18E-04              | Trio 12 |
|                 | 7:147259289              | c.T1837C | p.W613R     | N                     | Trio 20 |
| <i>COL11A2</i>  | 6:33156921               | c.C277T  | p.R93C      | N                     | Trio 32 |
| <i>DSCAM</i>    | 21:42080556              | c.C185T  | p.T62M      | N                     | Trio 36 |
| <i>FBN2</i>     | 5:127610373              | c.C7597T | p.L2533F    | N                     | Trio 20 |
|                 | 5:127613686              | c.T7357A | p.C2453S    | N                     | Trio 4  |
|                 | 5:127674703              | c.G3394A | p.V1132I    | 3.71E-04              | Trio 6  |
|                 | 5:127685149              | c.A2879G | p.E960G     | N                     | Trio 10 |
| <i>FBN1</i>     | 15:48779517              | c.C3455T | p.A1152V    | N                     | Trio 38 |
|                 | 15:48826346              | c.A793G  | p.T265A     | N                     | Trio 15 |
| <i>MAPK7</i>    | 17:19284408              | c.G469A  | p.A157T     | 6.90E-03              | Trio 3  |
| <i>VDR</i>      | 12:48258951              | c.G156T  | p.M52I      | 1.00E-03              | Trio 14 |
| <i>IFT122</i>   | 3:129159200              | c.T27G   | p.D9E       | 4.88E-04              | Trio 1  |
|                 | 3:129202460              | c.G1453A | p.G485S     | 1.00E-03              | Trio 31 |
|                 | 3:129233378              | c.A2804C | p.K935T     | N                     | Trio 40 |
|                 | 3:129238472              | c.G3203A | p.R1068H    | 8.38E-03              | Trio 29 |
| <i>IFT88</i>    | 13:21173662              | c.G713A  | p.R238Q     | 2.68E-03              | Trio 26 |
| <i>PTK7</i>     | 6:43109815               | c.C1525T | p.P509S     | 3.18E-04              | Trio 32 |
|                 | 6:43111200               | c.C1703G | p.P568R     | 6.00E-03              | Trio 25 |
|                 | 6:43112233               | c.G1906C | p.E636Q     | 3.00E-03              | Trio 35 |
|                 | 6:43112285               | c.A1958G | p.H653R     | 2.00E-03              | Trio 7  |
| <i>RPGRIP1L</i> | 16:53683024              | c.C2156G | p.T719R     | N                     | Trio 4  |

|                |             |          |         |          |         |
|----------------|-------------|----------|---------|----------|---------|
|                | 16:53706849 | c.G962A  | p.R321H | 1.53E-03 | Trio 11 |
| <i>SDCCAG8</i> | 1:243507569 | c.A1115G | p.E372G | 9.43E-03 | Trio 17 |
| <i>TTC26</i>   | 7:138822599 | c.C148T  | p.R50C  | 8.76E-03 | Trio 27 |
|                | 7:138849974 | c.C889T  | p.R297C | 6.09E-03 | Trio 22 |
|                | 7:138862965 | c.A1075G | p.I359V | 2.12E-04 | Trio 9  |
|                | 7:138865921 | c.C1396T | p.L466F | N        | Trio 24 |
| <i>TTL3</i>    | 3:9868810   | c.T1433G | p.F478C | N        | Trio 36 |
| <i>SLC39A8</i> | 4:103189063 | c.A813G  | p.I271M | 1.00E-03 | Trio 38 |
| <i>SOX6</i>    | 11:16208472 | c.C565T  | p.R189W | 5.80E-05 | Trio 34 |
| <i>KIF6</i>    | 6:39311541  | c.C725T  | p.T242M | 3.00E-04 | Trio 2  |
| <i>KIF6</i>    | 6:39602700  | c.A434G  | p.Y145C | N        | Trio 8  |

<sup>a</sup>Maximum frequency across public databases: 1000 Genomes Project phase 3; GnomAD, Genome Aggregation Database; and NHLBI Exome Sequencing Project databases; N: absence in any database

Supplementary Table 5. Rare damaging variant profile for AIS patients with two or more mutations of AIS-Associated genes

| Sample ID | AIS-Associated genes           | Sex | Spinal curve at first presentation, ° | Body mass index (Kg/m <sup>2</sup> ) | Age at menarche (yrs) | Age of curve onset (yrs) |
|-----------|--------------------------------|-----|---------------------------------------|--------------------------------------|-----------------------|--------------------------|
| Trio-3    | <i>CNTNAP2, MAPK7</i>          | F   | 20                                    | 24.73                                | 14                    | 13                       |
| Trio-4    | <i>FBN2, RPGRIPL</i>           | F   | 30                                    | 20.90                                | 14                    | 14                       |
| Trio-22   | <i>FLNB, TTC26</i>             | F   | 26                                    | 19.99                                | 11                    | 11                       |
| Trio-25   | <i>FLNB, PTK7</i>              | M   | 23                                    | 22.71                                | 10                    | 12                       |
| Trio-27   | <i>FLNB, TTC26</i>             | F   | 28                                    | 19.56                                | 12                    | 13                       |
| Trio-31   | <i>FLNB, IFT122</i>            | F   | 25                                    | 24.67                                | 15                    | 15                       |
| Trio-32   | <i>FLNB, COL11A2, PTK7</i>     | F   | 28                                    | 27.78                                | 15                    | 12                       |
| Trio-38   | <i>FBN1, SLC39A8</i>           | F   | 31                                    | 22.68                                | 13                    | 11                       |
| 24-11     | <i>PCMI, PTK7</i>              | F   | 18                                    | 20.02                                | 13                    | 12                       |
| 59-1      | <i>IFT88, CHL1, FLNB, PTK7</i> | F   | 24                                    | 18.20                                | 14                    | 11                       |
| 59-2      | <i>FLNB, TTLL3</i>             | F   | 22                                    | 20.09                                | 15                    | 14                       |
| 59-9      | <i>IFT88, CHL1</i>             | F   | 32                                    | 19.89                                | 13                    | 11                       |
| 59-10     | <i>FLNB, TTC26</i>             | F   | 26                                    | 20.44                                | 10                    | 12                       |
| 59-13     | <i>IFT88, FBN1, IFT172</i>     | F   | 34                                    | 19.52                                | 15                    | 12                       |
| 59-15     | <i>TTC26, ZMYND10</i>          | F   | 30                                    | 25.62                                | 14                    | 12                       |
| 59-16     | <i>DSCAM, TTC26</i>            | M   | 17                                    | 17.27                                | 11                    | 12                       |
| 59-17     | <i>MAPK7, FBN2</i>             | F   | 29                                    | 21.43                                | 12                    | 10                       |
| 59-19     | <i>TPHI, CNTNAP2</i>           | F   | 28                                    | 22.67                                | 12                    | 12                       |
| 59-21     | <i>HSPB11, FBN1, CHL1</i>      | F   | 31                                    | 23.67                                | 13                    | 13                       |
| 98-1      | <i>ESR2, POC5, FLNB</i>        | F   | 28                                    | 20.93                                | 13                    | 11                       |
| 98-3      | <i>POC5, IFT80</i>             | F   | 24                                    | 23.56                                | 15                    | 12                       |
| 98-4      | <i>FLNB, IFT27</i>             | M   | 22                                    | 18.86                                | 10                    | 12                       |
| 98-7      | <i>FBN1, FLNB, TTLL3</i>       | F   | 30                                    | 17.12                                | 10                    | 11                       |
| 98-9      | <i>IFT172, PCMI</i>            | F   | 27                                    | 17.10                                | 13                    | 12                       |



---

|       |                          |   |    |       |    |    |
|-------|--------------------------|---|----|-------|----|----|
| 98-10 | <i>TLL3, TLL6</i>        | F | 24 | 24.04 | 12 | 11 |
| 98-13 | <i>FLNB, PTK7</i>        | F | 22 | 19.27 | 13 | 10 |
| 98-16 | <i>CLUAP1, FLNB</i>      | F | 30 | 17.71 | 11 | 12 |
| 98-20 | <i>FBN2, IFT88</i>       | F | 27 | 17.45 | 14 | 10 |
| 98-21 | <i>TLL3, TLL6</i>        | F | 25 | 18.29 | 14 | 14 |
| 98-24 | <i>TTC26, SOX6</i>       | F | 13 | 23.81 | 14 | 14 |
| 98-36 | <i>CNTNAP2, TTC26</i>    | F | 30 | 23.13 | 10 | 12 |
| 98-46 | <i>CNTNAP2, DSCAM</i>    | F | 24 | 19.54 | 14 | 13 |
| 98-73 | <i>FLNB, OFD1</i>        | F | 21 | 17.32 | 12 | 13 |
| 43-5  | <i>SOX6, CLUPI</i>       | F | 27 | 20.13 | 12 | 12 |
| 43-13 | <i>AKAP2, CHL1</i>       | M | 22 | 18.86 | 13 | 11 |
| 43-29 | <i>FBN2, IFT88</i>       | F | 30 | 22.13 | 10 | 10 |
| 43-36 | <i>SOX6, FLNB, TTC26</i> | F | 31 | 19.07 | 10 | 11 |

---

Supplementary Table 6. *FLNB*-interacting partners with significant burden of rare-damaging variants

| Gene         | Other <i>FLNB</i> -interacting partners                 | Count |          | OR (95% CI)          | <i>p</i> |
|--------------|---------------------------------------------------------|-------|----------|----------------------|----------|
|              |                                                         | Cases | Controls |                      |          |
| <i>FLNA</i>  | <i>ASB2, KCNJ2, PDLIM2, FBLIM1, HACE1, GPIBA, IFGB6</i> | 6     | 0        | 12.073(1.476-98.783) | 2.58E-03 |
| <i>ITGB6</i> | <i>FLNA</i>                                             | 6     | 1        | 10.341(1.237-86.463) | 1.24E-02 |

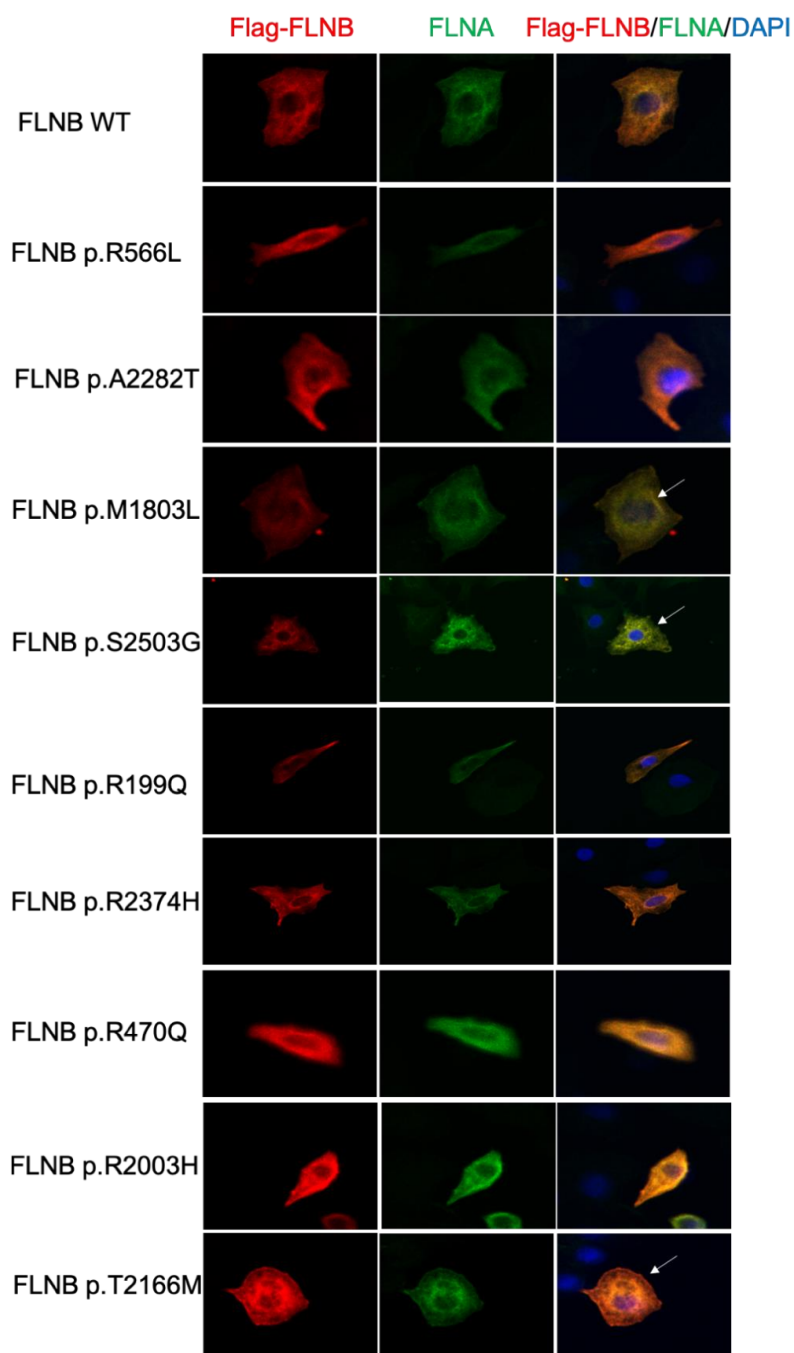

Supplementary Figure 1. Subcellular localization and expression is affected in some *FLNB* variants

293T cells were transfected with Flag-tagged *FLNB* expression vector (wildtype or mutant). Protein expression of each variant and wild-type *FLNB* was assessed with a Flag antibody (red). Nuclear counter-staining was performed with DAPI (blue) and protein expression of *FLNA* was stained with a FLNA antibody (green).

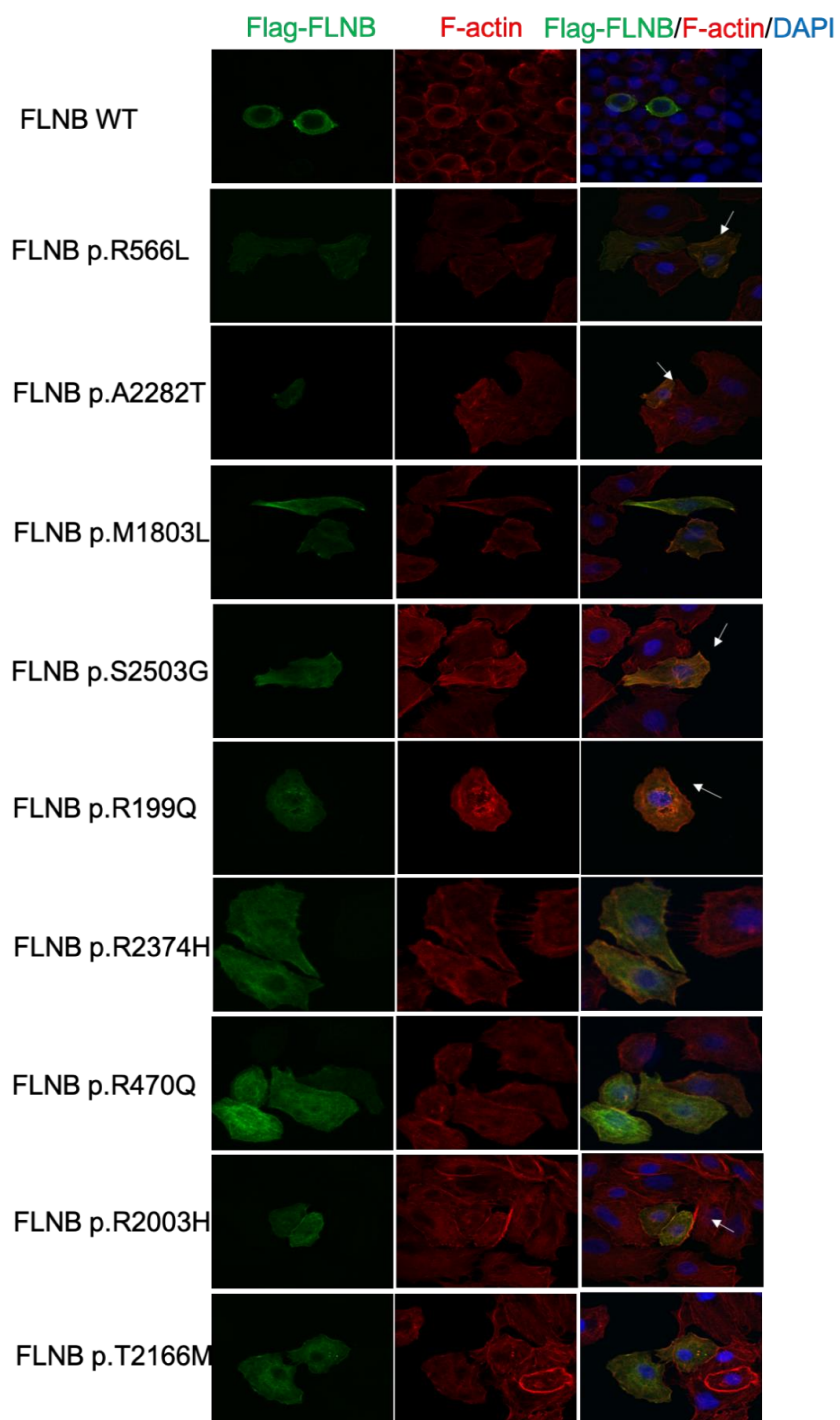

Supplementary Figure 2. Actin stress fiber formation is affected in some *FLNB* variants

293T cells were transfected with Flag-tagged *FLNB* expression vector (wildtype or mutant). Protein expression of each variant and wild-type *FLNB* was assessed with a Flag antibody (green). Nuclear counter-staining was performed with DAPI (blue) and stress fiber was stained with DyLight™ 554 Phalloidin (red).

Supplementary Table 7. Rare-damaging variants Gene-Based Burden Tests for AIS-Related Genes (In-house controls only)

| Rank | Gene           | Count of Rare-damaging Variants |                               | Frequency of Rare-damaging Variants in AIS subjects | Frequency of Rare-damaging Variants in controls subjects | OR (95% CI) (AIS versus controls) | p Value (AIS versus controls) |
|------|----------------|---------------------------------|-------------------------------|-----------------------------------------------------|----------------------------------------------------------|-----------------------------------|-------------------------------|
|      |                | AIS (n=223)                     | Controls <sup>a</sup> (n=153) |                                                     |                                                          |                                   |                               |
| 1    | <i>FLNB</i>    | 25                              | 3                             | 11.21%                                              | 1.96%                                                    | 6.313 (1.871-21.303)              | 5.15E-04                      |
| 2    | <i>TTC26</i>   | 16                              | 2                             | 7.17%                                               | 1.31%                                                    | 5.836 (1.322-25.761)              | 1.18E-02                      |
| 3    | <i>CNTNAP2</i> | 8                               | 0                             | 3.59%                                               | 0                                                        | 6.417 (0.805-51.172)              | 2.34E-02                      |
| 4    | <i>FBN1</i>    | 8                               | 0                             | 3.59%                                               | 0                                                        | 6.417 (0.805-51.172)              | 2.34E-02                      |
| 5    | <i>TLL3</i>    | 8                               | 0                             | 3.59%                                               | 0                                                        | 6.417 (0.805-51.172)              | 2.34E-02                      |
| 6    | <i>PTK7</i>    | 11                              | 1                             | 4.93%                                               | 0.65%                                                    | 7.887 (1.008-61.737)              | 3.20E-02                      |
| 7    | <i>IFT122</i>  | 6                               | 0                             | 2.69%                                               | 0                                                        | 4.945 (0.602-40.601)              | 8.50E-02                      |
| 8    | <i>FBN2</i>    | 8                               | 4                             | 3.59%                                               | 2.61%                                                    | 1.386 (0.410-4.687)               | 7.68E-01                      |

<sup>a</sup>only in-house controls (n=153) was included in gene-based burden tests here

p value is calculated using Fisher's exact test. CI, confidence interval, OR, odds ratio
